# Supplementary material for: Fusion and planarization of a quinoidal porphyrin dimerElectronic supplementary information (ESI) available: synthetic procedures. See http://www.rsc.org/suppdata/cc/b2/b204265g/
Source: Royal Society of Chemistry journal article supplement (doi:10.1039/b204265g), 2002-07-08
Supplement: b204265g.doc [file b204265g.doc]

Supplementary Material (ESI) for Chemical Communications

This journal is © The Royal Society of Chemistry 2002B204265G *Chemical Communications*

**Fusion and planarization of a quinoidal porphyrin dimer**

*Iain M. Blake, Alexander Krivokapic, Martin Katterle
and Harry L. Anderson*

***Supporting Information — Synthetic Procedures***

***Meso*-*Meso*,*-,-* Triply-Linked Dimer 4**

*Meso-meso* singly-linked dimer **3** (150 mg, 0.091 mmol), DDQ (45 mg, 0.199 mmol) and scandium(III) triflate (98 mg, 0.199 mmol) were dissolved in dry toluene (100 mL) under an inert atmosphere. The reaction was placed in a pre-heated oil bath at 80 ºC and stirred for 10 min. After this time, the reaction mixture was passed through a small silica plug washing with chloroform/pyridine before the product was separated from unreacted starting material on a silica column eluting with 60-80 petroleum ether/chloroform/pyridine (5:1:0.1). Both the reclaimed starting material (67 mg; 45%) and the triply-linked product were each crystallised from chloroform by layered addition of methanol. Yield of **4**: 14 mg (9%) [Longer reaction times reduced the amount of reisolated starting material but did not increase the yield of **4**]; mp > 250 ºC; 1H NMR (500 MHz, CDCl3/C5D5N) ** 8.43 (4H, d, *J* = 4.5 Hz), 7.61 (4H, d, *J* = 4.5 Hz), 7.59 (4H, t, *J* = 1.8 Hz), 7.53 (8H, d, *J* = 1.8 Hz), 7.09 (4H, s), 1.43 (72H, s); the product was not soluble enough for 13C NMR; UV-vis (1% C5H5N/CH2Cl2) **max (log **): 346 (4.52), 427 (5.14), 485 (4.82), 567 (5.15), 989 (4.24), 1139 (4.63) nm; MALDI-TOF *m/z* 1652.6 [M+], C96H96Br2N8Zn2 requires 1652.4.

***Meso*-*Meso*,*-,-* Triply-linked Quinoidal Dimer 1**

**A:** *Meso*-*meso*,*-,-* triply-linked dimer **4** (16 mg, 0.0097 mmol), tris(dibenzylideneacetone)dipalladium(0) (6.4 mg, 0.00097 mmol), triphenylphosphine (2.0 mg, 0.0077 mmol) and copper(I) iodide (0.7 mg, 0.004 mmol) were dissolved in dry THF (10 mL) and pyridine (100 L) under an inert atmosphere. Malononitrile (6.4 mg, 0.097 mmol) was added and the solution degassed. Sodium hydride (60% suspension in oil, 5.8 mg, 0.14 mmol) was then added and the reaction heated to reflux and stirred for 15 h. After this time, acetic acid (8 L, 0.14 mmol) was added and then *N*-iodosuccinimide (4.3 mg, 0.019 mmol) as a solution in dry THF (2 mL). Oxidation was instant and the reaction mixture was then filtered through a short silica plug and the pure product crystallised from chloroform by layered addition of methanol. Yield 13 mg (84%); mp > 250 ºC; 1H NMR (500 MHz, CDCl3/C5D5N) ** 7.50 (4H, t, *J* = 1.5 Hz), 7.24 (4H, d, *J* = 4.4 Hz), 7.20 (8H, d, *J* = 1.5 Hz), 6.48 (4H, d, *J* = 4.4 Hz), 6.29 (4H, s), 1.35 (72H, s); 13C NMR (125 MHz, CDCl3/C5D5N)  156.8, 153.9, 152.7, 150.4, 150.0, 148.6, 138.2, 132.1, 129.4, 126.2, 125.8, 125.5, 123.1, 122.7, 122.3, 117.4, 73.8, 35.3, 31.9; UV-vis (1% C5H5N/CH2Cl2) **max (log **): 411 (4.59), 449 (4.53), 618 (5.13), 849 (4.52), 959 (4.99) nm; IR (KBr) 2194 cm-1 (CN); MALDI-TOF *m/z* 1620.6 [M+], C102H96N12Zn2 requires 1620.7.

**B:** *Meso-meso* singly-linked quinoidal dimer **2** (15 mg, 0.0092), DDQ (4.2 mg, 0.018 mmol) and scandium(III) triflate (9.1 mg, 0.018 mmol) were dissolved in dry toluene (30 mL) under an inert atmosphere. The reaction was warmed to 70 ºC for 25 min and after this time, the reaction mixture was passed through a short silica plug. The pure product was then crystallised from chloroform by layered addition of methanol. Yield 12 mg (83%); characterisation as above.
